# Supplementary material for: Long-term air pollution exposure and diabetes risk in American older adults: a national cohort study
Source: bioRxiv or medRxiv preprint supplement (doi:10.1101/2021.09.09.21263282), 2022-03-30
Supplement: Supplementary file [file media-1.pdf]

## Supplementary information

### Air pollution exposure and diabetes occurrence

Maayan Yitshak Sade, Ph.D., Liuhua Shi, Sc.D., Elena Colicino, Ph.D., Heresh Amini, Ph.D.,  
Joel D Schwartz, Ph.D., Qian Di, Ph.D., and Robert O Wright, MD MPH.

**Supplementary Table 1.** The correlation between the exposures and climate variables.

|                    | PM <sub>2.5</sub> | NO <sub>2</sub> | Ozone | Summer temperature |
|--------------------|-------------------|-----------------|-------|--------------------|
| NO <sub>2</sub>    | 0.44              |                 |       |                    |
| Ozone              | 0.27              | 0.18            |       |                    |
| Summer temperature | 0.1               | -0.04           | 0.23  |                    |
| Winter temperature | -0.04             | -0.04           | -0.07 | 0.62               |

**Supplementary Table 2. Results of interaction analysis.**

| Pollutant         | Modifier | Restricted data –<br>ZIP codes where PM <sub>2.5</sub> and NO <sub>2</sub> did not exceed the<br>NAAQS (33%). |       |        | Main analytical data |        |       |       |
|-------------------|----------|---------------------------------------------------------------------------------------------------------------|-------|--------|----------------------|--------|-------|-------|
|                   |          | Strata                                                                                                        | IRR   | 95% CI | IRR                  | 95% CI |       |       |
| PM <sub>2.5</sub> | By sex   | Men                                                                                                           | 1.058 | 1.054  | 1.062                | 1.017  | 1.016 | 1.08  |
|                   |          | Women                                                                                                         | 1.040 | 1.036  | 1.044                | 0.996  | 0.994 | 0.998 |
|                   | By race  | White                                                                                                         | 1.043 | 1.040  | 1.046                | 1.008  | 1.006 | 1.010 |
|                   |          | Black                                                                                                         | 1.026 | 1.006  | 1.046                | 0.957  | 0.952 | 0.962 |
|                   |          | Other                                                                                                         | 1.025 | 1.014  | 1.037                | 0.957  | 0.952 | 0.962 |
| O <sub>3</sub>    | By sex   | Men                                                                                                           | 1.009 | 1.007  | 1.011                | 0.992  | 0.991 | 0.993 |
|                   |          | Women                                                                                                         | 1.022 | 1.020  | 1.024                | 0.999  | 0.998 | 1.000 |
|                   | By race  | White                                                                                                         | 1.014 | 1.012  | 1.016                | 0.994  | 0.993 | 0.995 |
|                   |          | Black                                                                                                         | 1.040 | 1.030  | 1.050                | 0.971  | 0.967 | 0.974 |
|                   |          | Other                                                                                                         | 1.024 | 1.018  | 1.030                | 0.971  | 0.967 | 0.974 |
| NO <sub>2</sub>   | By sex   | Men                                                                                                           | 1.037 | 1.032  | 1.042                | 1.163  | 1.161 | 1.165 |
|                   |          | Women                                                                                                         | 1.045 | 1.041  | 1.049                | 1.207  | 1.205 | 1.209 |
|                   | By race  | White                                                                                                         | 1.040 | 1.037  | 1.043                | 1.192  | 1.190 | 1.194 |
|                   |          | Black                                                                                                         | 1.036 | 1.018  | 1.054                | 1.155  | 1.150 | 1.160 |
|                   |          | Other                                                                                                         | 1.017 | 1.006  | 1.027                | 1.155  | 1.150 | 1.160 |

Supplementary Table 2 shows the results of stratified analyses by sex and race. The analyses were conducted in the main analytical dataset, and in a restricted dataset including only ZIP codes in which PM<sub>2.5</sub> and NO<sub>2</sub> did not exceed the NAAQS during the study period.

IRR= incidence rate ratio; 95% CI= 95% confidence intervals.

**Supplementary Table 3.** Baseline characteristics of person years by status of enrollment in the fee for service, part A, and part B programs.

|                          | Included (n=432,826,576 – 61%) | Excluded (n=283,734,324 - 39%) |
|--------------------------|--------------------------------|--------------------------------|
| Age, Mean (Q1; Q3)       | 76 (70; 82)                    | 74 (67; 80)                    |
| Female sex, n (%)        | 254,446,733 (58.7%)            | 156990829 (55.3%)              |
| Race, % (n)              |                                |                                |
| White                    | 381,308,542 (88.0%)            | 230,692,691 (81.3%)            |
| Black                    | 29,667,751 (6.8%)              | 26,666,991 (9.3%)              |
| Other                    | 19,535,981 (4.5%)              | 23,060,733 (8.1%)              |
| Missing                  | 2,314,302 (0.7%)               | 3,313,909 (1.3%)               |
| Medicaid eligible, % (n) | 50792506 (11.7%)               | 37,428,498 (13.1%)             |
| Death, % (n)             | 2141710 (0.4%)                 | 28664286 (10%)                 |

**Supplementary Table 4.** Comparison of results – the main analysis versus a sensitivity analysis weighted by the inverse probability of being in the cohort.

|                      | Main analysis        | Weighted population   |
|----------------------|----------------------|-----------------------|
| All available data   |                      |                       |
| PM <sub>2.5</sub>    | 1.005 (1.004; 1.006) | 1.014 (1.010; 1.018)  |
| O <sub>3</sub>       | 0.996 (0.995; 0.997) | 0.985 (0.982; 0.987)  |
| NO <sub>2</sub>      | 1.185 (1.184; 1.187) | 1.207 (1.203; 1.2114) |
| Low pollution levels |                      |                       |
| PM <sub>2.5</sub>    | 1.048 (1.045; 1.051) | 1.046 (1.037; 1.056)  |
| O <sub>3</sub>       | 1.016 (1.015; 1.018) | 1.007 (1.002; 1.012)  |
| NO <sub>2</sub>      | 1.040 (1.037; 1.043) | 1.033 (1.024; 1.042)  |
